# Supplementary material
Source: PubMed Central journal article supplement (PMC4006321)
Supplement: NIHMS568812-supplement-Legacy_Supplemental_File.pdf [file NIHMS568812-supplement-Legacy_Supplemental_File.pdf]

## **Supplemental Dataset**

### **Cerebral cavernous malformations arise independent of the Heart of Glass receptor**

Xiangjian Zheng, Ph.D<sup>1</sup>, Florence Riant<sup>2-4\*</sup>, Françoise Bergametti<sup>2-4\*</sup>, Cynthia D Myers, MD<sup>1</sup>, Alan T Tang, BS<sup>1</sup>, Benjamin Kleaveland, MD/Ph.D<sup>1</sup>, Wei Pan, Ph.D<sup>1</sup>, Jisheng Yang, BS<sup>1</sup>, Elisabeth Tournier-Lasserre, MD<sup>2-4</sup>, and Mark L. Kahn, MD<sup>1</sup>

**Supplemental Figure I. *Heg* deficiency does not alter endothelial junction protein expression in endothelial barrier function in vivo.** (A) *Heg*-deficiency does not alter the expression of junction proteins in freshly isolated lung endothelial cells as measured by quantitative PCR. (B) Vascular permeability is increased in adult mice with *Ccm2* deficiency (*Cdh5*-CreERT2;*Ccm2*<sup>fl/fl</sup>), but *Heg* deficiency (*Heg*<sup>-/-</sup>) as measured by extravasated Evans blue dye.

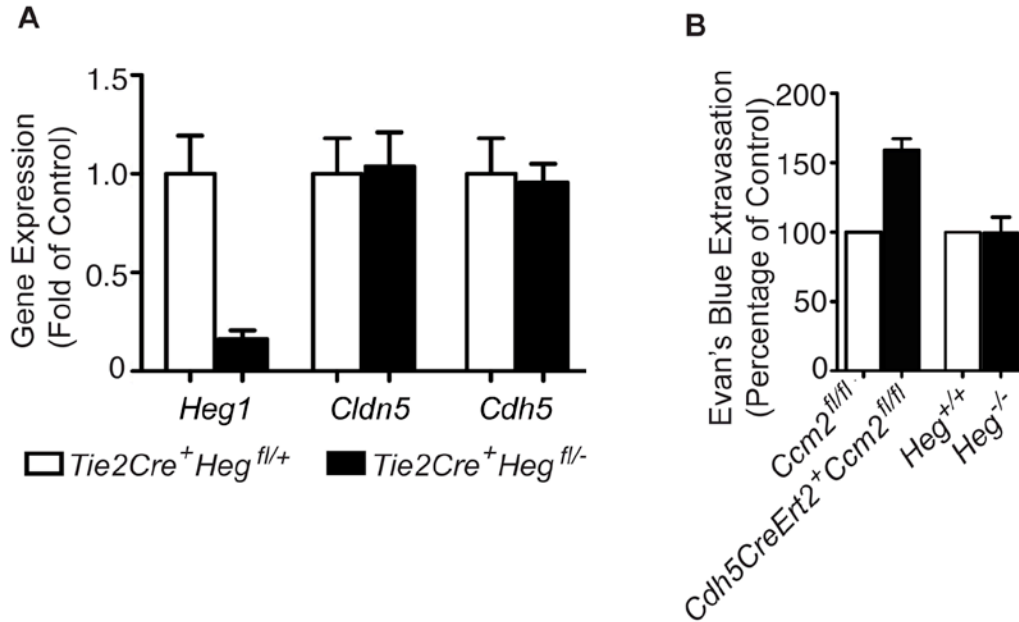

## Supplemental Table I. Primer sequences

### Genomic DNA PCR / sequence Primers

| exons | forward primer             | reverse primer         |
|-------|----------------------------|------------------------|
| 1     | GCCTCACTCCGCTCACTT         | CTCAGTCCAGCCAAGTGC     |
| 2     | GCAATGGCACGTTCTTTGG        | GGCACAATGGCTCAGAAT     |
| 3     | TCTGATACTTACCTCCAGTGAGC    | GCTGGCTATGCACATTGATT   |
| 4     | GAGAGTGCAGGCATGTGTC        | GATGGAACCAAGAACCCTGA   |
| 5b*   | CAAGGGCAACAGACATCTCA       | GCAAACACTATCCCAAATTC   |
| 6 (a) | CAATGTCTTTATTTCAGAGTGCTCA  | GCCAGTGACCAGAGATGCT    |
| 6 (b) | CCACAAGCACCAACTTAGCA       | CTGATCCAGACGCAGATACC   |
| 7-8   | GGCCTTTCAGGGCAAGTA         | TGCAAAGTAGGGTGTCTATCTC |
| 9     | GAGATGTGCAAACACACAGC       | GTGAAGAGCCCAGGAGACAC   |
| 10-11 | AGGACACCCTTCTGTGCAA        | TCTTTGACTTAACACCCCATGC |
| 12    | AGGTTTGAAGTGGAGAAGGTT      | GTCACGCCTAAGCAAAGACA   |
| 13-14 | TAGGGTGGCTGGCGTTTAAT       | GGTGTGAACTGAGGGAAGTG   |
| 15    | AGGCAGGGTGGTGACTGTA        | AAAGGAACGGGATTGGAAC    |
| 16    | TGTAGAAGAGTCTAAATCTGCCCTAT | AAATCAGAGGTTTCATGCCACT |
| 17    | AGTTGCCCTTCTGCATGGTT       | CTTCCTGCTTGCCACTCA     |

### cDNA PCR / sequence Primers

| exons | forward primer       | reverse primer        |
|-------|----------------------|-----------------------|
| 2-4   | CAGCTCTGACTTCCCAGAGT | GGCCAGTGGAGTTGTAAAGC  |
| 3-6   | CCATCCAGCAGTTCAGAGTT | CCACGCACTTGACCGTAG    |
| 5-6   | GACCAACAGCACAACATCTG | CATCCACAATCACTCGGTTC  |
| 6-11  | CAGCCACAAGCACCAACTTA | GCAGAGGACTTGCAAGGAGTT |
| 8-17  | CACAGCCATGTGCAACAATA | CTTCCTGCTTGCCACTCA    |

### QMPSF primers

| exons | forward primer            | reverse primer          |
|-------|---------------------------|-------------------------|
| 1     | GCGGCTCCCGATAACTTTT       | GGCGAGGCCATGGTGAC       |
| 2     | TCAGATGCTGCCTGGAAACA      | CTCTTTGGAGGACACTGTTGAAA |
| 3     | GAAAGTCTTACCTGCCATCCA     | TCCCATCTCCGAGGCTGTT     |
| 4     | CCTCAGTCCCTTCTTTCACCCCTCT | GGAATCATTTTGCCAACGCA    |
| 5     | CTTACAGCCTTTGGAGAACATCA   | GGGTGCGACTGACCTAGACAC   |
| 6     | CATTACAGAATCAAAGTCACCAAGC | CTTGTGGCTGGAAGGGTTTG    |

|       |                               |                             |
|-------|-------------------------------|-----------------------------|
| 7     | AGCTGCCTTTACATTTCCCTGTG       | GGCTGGTGTGTCTGCGAC          |
| 8     | ATGTGAATGAGTGCCTGTCGA         | CGGAATAAAGTCCGAAATAGACTAA   |
| 9     | GAGAACTTTTCTTAATACAACCTGTGGAA | GCAGTCCCCTCTTGGAAATAAAAT    |
| 10    | ATCCGATCTACAGTTCACGCCT        | CACCCATGTTAGAACAGCCTCC      |
| 11    | TGCAAACAACCTTTTCCCTG          | CAAGAGCTGGCAGACCTCAG        |
| 12    | AGTCCCGAATGTGACAAAGACAC       | TGGTCCATCTTGTGAACTGAAA      |
| 13-14 | ATAGGCTTGAAAAATGAAACCTGC      | CATAATGGTCCACTTTTGTACACTTAC |
| 15    | AGGCATCGCACTGATTGTTACC        | TTGTGAACCATCTCAAGTATCCTGTA  |
| 16    | CACAAGAATGGGGCCGAGA           | CCCTGGGGTCATCCTGACA         |
| 17    | TCCTCGCTCACAAGAATGGG          | TCCTTTACTTCTCAGAGGAACCG     |

**Supplemental Table II. Frequency of CCM formation in the mice lacking HEG and CCM2.**

| <b>Genotypes</b>                                                                                 | <b>n</b> | <b>% with CCM</b> |
|--------------------------------------------------------------------------------------------------|----------|-------------------|
| <i>TieERT2</i> <sup>+</sup> <i>Ccm2</i> <sup>fl/fl</sup> (P18-21)                                | 4        | 100               |
| <i>TieERT2</i> <sup>+</sup> <i>Ccm2</i> <sup>fl/fl</sup> (3-7mo)                                 | 3        | 100               |
|                                                                                                  |          |                   |
| <i>Heg</i> <sup>-/-</sup> (P18-21)                                                               | 20       | 0                 |
| <i>Heg</i> <sup>-/-</sup> (3-8 mo)                                                               | 23       | 0                 |
| <i>Heg</i> <sup>-/-</sup> (9-20 mo)                                                              | 11       | 0                 |
|                                                                                                  |          |                   |
| <i>TieERT2</i> <sup>+</sup> <i>Heg</i> <sup>fl/fl(-)</sup> <i>Ccm2</i> <sup>fl/+</sup> (P18-21)  | 16       | 0                 |
| <i>TieERT2</i> <sup>+</sup> <i>Heg</i> <sup>fl/fl(-)</sup> <i>Ccm2</i> <sup>fl/fl</sup> (P18-21) | 6        | 100               |

**Supplemental Table III. Patients and biological materials**

| Family number | Sporadic/Familial | RNA source |
|---------------|-------------------|------------|
| C036          | Familial          | LCL        |
| C046          | Familial          | LCL        |
| C053          | Sporadic          | LCL        |
| C056          | Sporadic          | LCL        |
| C057          | Sporadic          | LCL        |
| C064          | Sporadic          | LCL        |
| C080          | Sporadic          | LCL        |
| C082          | Sporadic          | LCL        |
| C083          | Sporadic          | LCL        |
| C099          | Sporadic          | LCL        |
| C108          | Sporadic          | LCL        |
| C129          | Sporadic          | None       |
| C130          | Sporadic          | LCL        |
| C133          | Sporadic          | LCL        |
| C140          | Sporadic          | None       |
| C142          | Sporadic          | LCL        |
| C153          | Familial          | PBMC       |
| C155          | Sporadic          | None       |
| C157          | Sporadic          | None       |
| C169          | Sporadic          | None       |
| C183          | Sporadic          | PBMC       |

LCL : Lymphoblastoid cell line ; PBMC : Peripheral blood mononuclear cell

**Supplemental Table IV. SNPs in *HEG1* gene detected in patients**

| SNP                             |             | Allele frequency in CCM patients (%) | SNP present in dbSNP137 | MAF <sup>1</sup> in 1000g <sup>2</sup> (%) | MAF in EVS <sup>3</sup> (%) |
|---------------------------------|-------------|--------------------------------------|-------------------------|--------------------------------------------|-----------------------------|
| c.69_70insATG / p.L23_P24insM   |             | 21.4                                 | No                      | No                                         | 16,8                        |
| c.92 G>A ; p.R31Q               | rs186106404 | 9.5                                  | Yes                     | 5.3                                        | No                          |
| c.303 A>C ; p.R101S             | rs62265663  | 23.8                                 | Yes                     | 15.6                                       | No                          |
| c.423 C>T ; p.G141=             | rs2860440   | 47.6                                 | Yes                     | 48.8                                       | 46                          |
| c.615A>G ; p.S205=              | rs4404487   | 45.2                                 | Yes                     | 26,6                                       | 35                          |
| c.780 G>T ; p.P260=             | rs2333041   | 52.4                                 | Yes                     | 49.2                                       | 48.7                        |
| c.913T>C ; p.S305P              | rs2981546   | 47.6                                 | Yes                     | 47.6                                       | 45.8                        |
| c.940A>G ; p.N314D              | rs150448589 | 2.4                                  | Yes                     | 0.1                                        | 0.3                         |
| c.996C>T ; p.A332=              | rs6438874   | 52.4                                 | Yes                     | 49.8                                       | 48,2                        |
| c.1587 G>A ; p.S529=            | rs59232004  | 47.6                                 | Yes                     | 48.9                                       | 46                          |
| c.1805T>C ; p.F602S             | rs6790837   | 47.6                                 | Yes                     | 44.4                                       | 42.4                        |
| c.1975_1992dup ; p.S667_S672dup | rs376430192 | 7.1                                  | Yes                     | No                                         | 0.2*                        |
| c.2734A>T ; p.T912S             | rs78680419  | 7.1                                  | Yes                     | 26.1                                       | 15.9                        |
| c.2938G>C ; p.V980L             | rs10804567  | 42.8                                 | Yes                     | 27.4                                       | 37.5                        |
| c.3116T>C ; p.M1039T            | rs6438869   | 35.7                                 | Yes                     | 35.7                                       | 37                          |
| c.3882G>A ; p.P1294=            | rs2270778   | 26.2                                 | Yes                     | 29.6                                       | 33                          |

<sup>1</sup> MAF : Minor Allele Frequency

<sup>2</sup> 1000 genome data base

<sup>3</sup> Exome Variant Server database

\* insertion at the same position of 5 serines. This polymorphism is in a polySer repeat.
